# Supplementary material
Source: PubMed Central journal article supplement (PMC5925799)
Supplement: supp_RA117.001154_134209_2_supp_89714_p576g5.pdf [file supp_RA117.001154_134209_2_supp_89714_p576g5.pdf]

# Inhibition of strigolactone receptors by *N*-phenylanthranilic acid derivatives: structural and functional insights

Cyril Hamiaux<sup>‡1</sup>, Revel S. M. Drummond<sup>‡</sup>, Zhiwei Luo<sup>‡</sup>, Hui Wen Lee<sup>‡,§</sup>, Prachi Sharma<sup>‡,§</sup>, Bart J. Janssen<sup>‡</sup>, Nigel B. Perry<sup>¶,‡</sup>, William A. Denny<sup>α</sup>, Kimberley C. Snowden<sup>‡2</sup>

## Supporting Information

### List of content:

#### Supplementary Tables

**Table S1.** Strigolactone compounds used in this study.

**Table S2.** Binding and kinetic parameters of DAD2, OsD14 and AtD14 with substrates and inhibitors.

**Table S3.** List of compounds used for SAR studies.

**Table S4.** Autodock Vina docking score for tolfenamic acid in models of D14 orthologues.

#### Supplementary Figures

**Figure S1.** Structural comparisons.

**Figure S2.** Omit maps.

**Figure S3.** DSF assay of DAD2 and DAD2<sub>Phe27Val</sub> (F27V).

**Figure S4.** DAD2 binding and kinetics.

**Figure S5.** SAR study.

**Figure S6.** DAD2 phylogenetic analysis.

**Figure S7.** OsD14 binding and kinetics.

**Figure S8.** AtD14 binding and kinetics.

**Figure S9.** Effects of compounds on germination of *Orobancha minor* seed.

**Figure S10.** Comparisons of the internal cavities of DAD2 and ShHTL5.

**Figure S11.** D53 Phylogenetic analysis.

**Figure S12.** Western blot controls for expression of proteins in yeast.

## Supplementary Tables

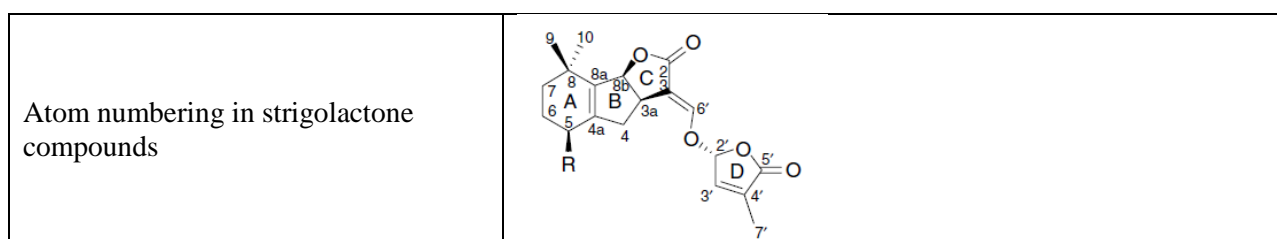

| Name       | Chiral centres |   |    |    | Structure | Source   |
|------------|----------------|---|----|----|-----------|----------|
|            | 3a             | - | 8b | 2' |           |          |
| (rac)-GR24 | R*             | - | S* | R* |           | Chiralix |
| (+)-GR24   | R              | - | S  | R  |           | Chiralix |

| Name          | Chiral centres |    |    |    | Structure | Source   |
|---------------|----------------|----|----|----|-----------|----------|
|               | 3a             | 5  | 8b | 2' |           |          |
| (rac)-Strigol | R*             | S* | S* | R* |           | OiChemlm |

| Name             | Chiral centres |    |    |    | Structure | Source   |
|------------------|----------------|----|----|----|-----------|----------|
|                  | 3a             | 4  | 8b | 2' |           |          |
| (rac)-Orobanchol | R*             | R* | R* | R* |           | OiChemlm |

| Name      | Chiral centres |   |    |    | Structure | Source                |
|-----------|----------------|---|----|----|-----------|-----------------------|
|           | 3a             | - | 8b | 2' |           |                       |
| (rac)-5DS | R*             | - | S* | R* |           | OiChemlm              |
| (+)-5DS   | R              | - | S  | R  |           | Wageningen University |

|                         |   |   |   |   |                                                                                   |                       |
|-------------------------|---|---|---|---|-----------------------------------------------------------------------------------|-----------------------|
| (-)-5DS                 | S | - | R | S | 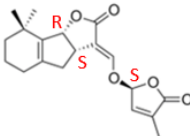 | Wageningen University |
| (+)-2'- <i>epi</i> -5DS | R | - | S | S |  | Wageningen University |
| (-)-2'- <i>epi</i> -5DS | S | - | R | R |  | Wageningen University |

**Table S1.** Strigolactone compounds used in this study. The 5DS pure isomers were a kind gift from Harro Bouwmeester and Yanxia Zhang (Wageningen University)

| <b>Protein</b> |                                 | <b>Tolfenamic acid</b> | <b>MNAB</b>     | <b>Mefenamic Acid</b> | <b>Flufenamic acid</b> | <b>(rac)-GR24</b> | <b>(+)-GR24</b> | <b>YLG</b>        |
|----------------|---------------------------------|------------------------|-----------------|-----------------------|------------------------|-------------------|-----------------|-------------------|
| <b>DAD2</b>    | $K_d$ ( $\mu\text{M}$ )         | $4.3 \pm 0.5$          | $4.6 \pm 0.5$   | $4.7 \pm 0.5$         | $10.8 \pm 0.5$         | $31.6 \pm 6.9$    | $28.1 \pm 6.5$  | n.d.              |
|                | $K_i$ ( $\mu\text{M}$ )         | $0.12 \pm 0.02$        | $0.16 \pm 0.02$ | $0.39 \pm 0.08$       | n.d.                   | n.d.              | n.d.            | -                 |
|                | $K_{1/2}$ ( $\mu\text{M}$ )     | $1.06 \pm 0.08$        | $1.32 \pm 0.09$ | $1.28 \pm 0.11$       | n.d.                   | n.d.              | n.d.            | $1.12 \pm 0.10$   |
|                | $k_{cat}$ ( $\text{min}^{-1}$ ) | -                      | -               | -                     | -                      | -                 | -               | $0.076 \pm 0.003$ |
| <b>OsD14</b>   | $K_d$ ( $\mu\text{M}$ )         | $9.3 \pm 0.4$          | $8.0 \pm 0.4$   |                       |                        | $44 \pm 26$       |                 | n.d.              |
|                | $K_i$ ( $\mu\text{M}$ )         | $3.20 \pm 0.54$        | $2.40 \pm 0.42$ |                       |                        | n.d.              |                 | -                 |
|                | $K_{1/2}$ ( $\mu\text{M}$ )     | $3.42 \pm 0.26$        | $3.35 \pm 0.27$ |                       |                        | n.d.              |                 | $3.32 \pm 0.36$   |
|                | $k_{cat}$ ( $\text{min}^{-1}$ ) | -                      | -               |                       |                        | -                 |                 | $0.150 \pm 0.008$ |
| <b>AtD14</b>   | $K_d$ ( $\mu\text{M}$ )         | $11.2 \pm 0.7$         | $11.0 \pm 0.6$  |                       |                        | $37 \pm 14$       |                 | n.d.              |
|                | $K_i$ ( $\mu\text{M}$ )         | $2.52 \pm 0.27$        | $1.90 \pm 0.25$ |                       |                        | n.d.              |                 | -                 |
|                | $K_{1/2}$ ( $\mu\text{M}$ )     | $1.02 \pm 0.05$        | $1.21 \pm 0.11$ |                       |                        | n.d.              |                 | $1.05 \pm 0.08$   |
|                | $k_{cat}$ ( $\text{min}^{-1}$ ) | -                      | -               |                       |                        | -                 |                 | $0.102 \pm 0.003$ |

**Table S2.** Binding and kinetic parameters of DAD2, OsD14 and AtD14 with substrates and inhibitors

| Compounds B1-B118 are N-Phenylanthranilic acid derivatives |                                       |                                   | 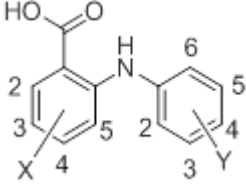 |        |
|------------------------------------------------------------|---------------------------------------|-----------------------------------|------------------------------------------------------------------------------------|--------|
| Compound ID                                                | X                                     | Y                                 | formula                                                                            | MW     |
| B1                                                         | 3-Br, 4-F                             | 4-I, 6-F                          | C13H6BrF2IN2O4                                                                     | 499.00 |
| B2                                                         | 3-Br, 4,5- =NON=                      | 4-I, 6-F                          | C13H6BrFIN3O3                                                                      | 478.18 |
| B3                                                         | 3,4-diF, 5-NO <sub>2</sub>            | 4-I, 6-F                          | C13H6F3IN2O4                                                                       | 438.10 |
| B4                                                         | 4,5-diF                               | 2,6-diF                           | C13H6F4INO2                                                                        | 411.09 |
| B5                                                         | 5-NO <sub>2</sub>                     | 2,6-diF                           | C13H8F2N2O4                                                                        | 294.22 |
| B6                                                         | 4-Br                                  | 3-Br                              | C13H9Br2NO2                                                                        | 371.03 |
| B7                                                         | 4-Cl                                  | 3-Cl                              | C13H9Cl2NO2                                                                        | 282.13 |
| B8                                                         | 4-I                                   | 3-I                               | C13H9I2NO2                                                                         | 465.03 |
| B9                                                         | H                                     | 3-Cl                              | C13H10ClNO2                                                                        | 247.68 |
| B10                                                        | 4-Br                                  | H                                 | C13H10BrNO2                                                                        | 292.13 |
| B11                                                        | H                                     | 3-F                               | C13H10FNO2                                                                         | 231.23 |
| B12                                                        | H                                     | 2-F                               | C13H10FNO2                                                                         | 231.23 |
| B13                                                        | H                                     | 2-Cl                              | C13H10ClNO2                                                                        | 247.68 |
| B14                                                        | H                                     | 4-Cl                              | C13H10ClNO2                                                                        | 247.68 |
| B15                                                        | 3-aza                                 | 2-CO <sub>2</sub> H               | C13H10N2O4                                                                         | 258.23 |
| B16                                                        | H                                     | 2-SO <sub>3</sub> H               | C13H11NO5S                                                                         | 293.30 |
| B17                                                        | 3-NO <sub>2</sub> , 4-NH <sub>2</sub> | H                                 | C13H11N3O4                                                                         | 273.30 |
| B18                                                        | 4-NO <sub>2</sub>                     | 4-NH <sub>2</sub>                 | C13H11N3O4                                                                         | 273.50 |
| B19                                                        | H                                     | 2-NH <sub>2</sub>                 | C13H12N2O2                                                                         | 228.25 |
| B20                                                        | H                                     | 2-SO <sub>2</sub> NH <sub>2</sub> | C13H12N2O4S                                                                        | 292.31 |
| B21                                                        | 5-CO <sub>2</sub> H                   | 4-F                               | C14H10FNO4                                                                         | 275.24 |
| B22                                                        | 5-CO <sub>2</sub> H                   | 2-I                               | C14H10INO4                                                                         | 383.14 |
| B23                                                        | 5-CO <sub>2</sub> H                   | 2-Br                              | C14H10BrNO4                                                                        | 336.14 |
| B24                                                        | 5-CO <sub>2</sub> H                   | 2-F                               | C14H10FNO4                                                                         | 275.24 |
| B25                                                        | 5-CO <sub>2</sub> H                   | 3-NO <sub>2</sub>                 | C14H10N2O6                                                                         | 302.25 |
| B26                                                        | 5-CO <sub>2</sub> H                   | 4-NO <sub>2</sub>                 | C14H10N2O6                                                                         | 302.25 |
| B27                                                        | 5-CO <sub>2</sub> H                   | 4-Cl                              | C14H10ClNO4                                                                        | 291.69 |
| B28                                                        | H                                     | 3-CF <sub>3</sub>                 | C14H10F3NO2                                                                        | 281.20 |
| B29                                                        | 5-CO <sub>2</sub> H                   | 4-Br                              | C14H10BrNO4                                                                        | 336.14 |
| B30                                                        | 2-NO <sub>2</sub> , 4-F               | 2,6-diI                           | C14H10FIN2O4                                                                       | 416.15 |

|     |                     |                                       |                          |        |
|-----|---------------------|---------------------------------------|--------------------------|--------|
| B31 | 4,5-diF             | 4-SMe, 6-F                            | C14H10F3NO2S             | 313.30 |
| B32 | 4,5-diF             | 4-SO <sub>2</sub> Me, 6-F             | C14H10F3NO4S             | 345.30 |
| B33 | 3,4,5-triF          | 6-Me                                  | C14H10F3NO2              | 281.24 |
| B34 | 4,5-diF             | 4-Me, 6-F                             | C14H10F3NO2              | 281.24 |
| B35 | 4-CO <sub>2</sub> H | H                                     | C14H11NO4                | 257.25 |
| B36 | H                   | 4-CO <sub>2</sub> H                   | C14H11NO4                | 257.25 |
| B37 | H                   | 6-CO <sub>2</sub> H                   | C14H11NO4                | 257.25 |
| B38 | 6-CO <sub>2</sub> H | H                                     | C14H11NO4                | 257.25 |
| B39 | H                   | 3-CF <sub>3</sub> , 4-NH <sub>2</sub> | C14H11F3N2O <sub>2</sub> | 296.25 |
| B40 | 3-Me                | 2-NO <sub>2</sub> , 5-Br              | C14H11BrN2O4             | 351.16 |
| B41 | 5-NO <sub>2</sub>   | 2-F, 5-Me                             | C14H11FN2O4              | 290.25 |
| B42 | 5-NO <sub>2</sub>   | 2-Cl, 5-OMe                           | C14H11ClN2O5             | 322.71 |
| B43 | 3-Br                | 4-Br, 6-CO <sub>2</sub> H             | C14H11Br2NO3             | 401.06 |
| B44 | 2-CO <sub>2</sub> H | H                                     | C14H11NO4                | 257.25 |
| B45 | 5-NO <sub>2</sub>   | 2-Me, 4-Cl                            | C14H11ClN2O4             | 306.71 |
| B46 | H                   | 2-Me, 3-NO <sub>2</sub>               | C14H12N2O4               | 272.26 |
| B47 | H                   | 2-Me, 5-NO <sub>2</sub>               | C14H12N2O4               | 272.26 |
| B48 | 3-Me                | 2-NO <sub>2</sub>                     | C14H12N2O4               | 272.26 |
| B49 | 5-NO <sub>2</sub>   | 2-OMe                                 | C14H12N2O5               | 288.26 |
| B50 | 5-NO <sub>2</sub>   | 3-OMe                                 | C14H12N2O5               | 288.26 |
| B51 | 4-OMe               | 2-NO <sub>2</sub>                     | C14H12N2O5               | 288.26 |
| B52 | H                   | 2-Me, 4-NO <sub>2</sub>               | C14H12N2O5               | 288.26 |
| B53 | H                   | 2-Me, 3-Cl                            | C14H12ClNO2              | 261.71 |
| B54 | 4-Br                | 2-Me                                  | C14H12BrNO2              | 306.16 |
| B55 | 4-Cl                | 2-Me                                  | C14H12ClNO2              | 261.71 |
| B56 | 4-F                 | 2-Me                                  | C14H12FNO2               | 245.26 |
| B57 | 4-Br                | 2-OMe                                 | C14H12BrNO3              | 322.16 |
| B58 | 4-F                 | 2-OMe                                 | C14H12FNO3               | 261.26 |
| B59 | 4-Cl                | 3-OMe                                 | C14H12ClNO3              | 277.71 |
| B60 | 4-NO <sub>2</sub>   | 3-OMe                                 | C14H12N2O5               | 288.26 |
| B61 | 4-NO <sub>2</sub>   | 2-OMe                                 | C14H12N2O5               | 288.26 |
| B62 | 5-NO <sub>2</sub>   | 2-OSO <sub>2</sub> Me                 | C14H12N2O7S              | 352.32 |
| B63 | 4-Cl                | 2-OMe                                 | C14H12ClNO3              | 277.71 |
| B64 | H                   | 4-Me                                  | C14H13NO2                | 227.27 |
| B65 | H                   | 3-Me                                  | C14H13NO2                | 227.27 |
| B66 | H                   | 4-OMe                                 | C14H13NO3                | 243.26 |
| B67 | H                   | 3-OMe                                 | C14H13NO3                | 243.26 |
| B68 | H                   | 3-OMe                                 | C14H13NO3                | 243.26 |

|      |                          |                                     |              |        |
|------|--------------------------|-------------------------------------|--------------|--------|
| B69  | 3-Me, 5-NH <sub>2</sub>  | H                                   | C14H14N2O2   | 242.28 |
| B70  | 4-OMe, 5-NH <sub>2</sub> | H                                   | C14H14N2O3   | 258.28 |
| B71  | 4,5-diMe                 | 4-C <sup>o</sup> CH                 | C15H8F3NO2   | 291.23 |
| B72  | 4-Cl                     | 2,6-diCO <sub>2</sub> H             | C15H10ClNO6  | 335.70 |
| B73  | 5-CF <sub>3</sub>        | 3-CO <sub>2</sub> H                 | C15H10F3NO4  | 325.25 |
| B74  | H                        | 2-COCO <sub>2</sub> H, 5-Br         | C15H10BrNO5  | 364.15 |
| B75  | 5-CO <sub>2</sub> H      | 4-CF <sub>3</sub>                   | C15H10F3NO4  | 325.25 |
| B76  | 5-CO <sub>2</sub> H      | 2-CF <sub>3</sub>                   | C15H10F3NO4  | 325.25 |
| B77  | 3,5-diBr                 | 2-CO <sub>2</sub> Me                | C15H11Br2NO4 | 429.07 |
| B78  | 5-CO <sub>2</sub> H      | 4-CO <sub>2</sub> H                 | C15H11NO6    | 301.29 |
| B79  | 4,5-diF                  | 4-CO <sub>2</sub> NHMe, 6-F         | C15H11F3N2O3 | 324.26 |
| B80  | H                        | 3-F, 5-CO <sub>2</sub> Me           | C15H12FNO4   | 289.26 |
| B81  | 5-CO <sub>2</sub> H      | 2-Me, 5-NO <sub>2</sub>             | C15H12N2O6   | 312.27 |
| B82  | 4-Cl                     | 2-CO <sub>2</sub> Me                | C15H12ClNO4  | 305.72 |
| B83  | 5-CO <sub>2</sub> H      | 2-Cl, 5-OMe                         | C15H12ClNO5  | 321.72 |
| B84  | 5-Cl                     | 2-CH <sub>2</sub> CO <sub>2</sub> H | C15H12ClNO4  | 305.72 |
| B85  | 5-NO <sub>2</sub>        | 2-F, 5-NHCOMe                       | C15H12FN3O5  | 333.28 |
| B86  | 4-Cl                     | 2-CH <sub>2</sub> CO <sub>2</sub> H | C15H12ClNO4  | 305.72 |
| B87  | 4-Br                     | 2-CO <sub>2</sub> Me                | C15H12BrNO4  | 350.17 |
| B88  | 5-CO <sub>2</sub> H      | 2-Cl, 4-Me                          | C15H12ClNO4  | 305.72 |
| B89  | 4-F                      | 2-CO <sub>2</sub> Me                | C15H12FNO4   | 289.26 |
| B90  | 2-CO <sub>2</sub> H      | 4-SMe                               | C15H13NO4S   | 303.34 |
| B91  | H                        | 2-COMe                              | C15H13NO3    | 255.28 |
| B92  | 4-Cl                     | 2,3-diMe                            | C15H14ClNO2  | 275.74 |
| B93  | H                        | 2,3-diMe                            | C15H15NO2    | 241.29 |
| B94  | H                        | 2,5-diMe                            | C15H15NO2    | 241.29 |
| B95  | 5-OMe                    | 2-OMe                               | C15H15NO4    | 273.29 |
| B96  | H                        | 4-NMe <sub>2</sub>                  | C15H16N2O2   | 256.31 |
| B97  | H                        | 2,3-(4-pyridyl)                     | C16H12N2O2   | 264.29 |
| B98  | H                        | 2,3-(3-pyridyl)                     | C16H12N2O2   | 264.29 |
| B99  | H                        | 2,3-(5-pyridyl)                     | C16H12N2O2   | 264.29 |
| B100 | 5-CF <sub>3</sub>        | 2-CO <sub>2</sub> Me                | C16H12F3NO4  | 339.27 |
| B101 | 4,5-diF                  | 3,4-benzo                           | C17H11F2NO2  | 299.28 |
| B102 | 4,5-diF                  | 2,3-benzo                           | C17H11F2NO2  | 299.28 |
| B103 | 3,4-benzo                | H                                   | C17H13NO2    | 263.29 |
| B104 | H                        | 3,4-benzo                           | C17H13NO2    | 263.29 |
| B105 | H                        | 2,3-benzo                           | C17H13NO2    | 263.29 |
| B106 | H                        | 3-(4-pyridyl)                       | C18H14N2O2   | 290.32 |

|                                                              |                                                                                    |                         |                                                                                      |        |
|--------------------------------------------------------------|------------------------------------------------------------------------------------|-------------------------|--------------------------------------------------------------------------------------|--------|
| B107                                                         | H                                                                                  | 2-phenyl                | C <sub>19</sub> H <sub>15</sub> NO <sub>2</sub>                                      | 289.34 |
| B108                                                         | 5-CO <sub>2</sub> H                                                                | 4-phenyl                | C <sub>20</sub> H <sub>15</sub> NO <sub>4</sub>                                      | 333.35 |
| B109                                                         | 5-CO <sub>2</sub> H                                                                | 2-SPh                   | C <sub>20</sub> H <sub>15</sub> NO <sub>4</sub> S                                    | 365.41 |
| B110                                                         | H                                                                                  | 2-COPh                  | C <sub>20</sub> H <sub>15</sub> NO <sub>3</sub>                                      | 317.35 |
| B112                                                         | 5-aza                                                                              | H                       | C <sub>12</sub> H <sub>10</sub> N <sub>2</sub> O <sub>2</sub>                        | 214.22 |
| B113                                                         | H                                                                                  | 3-aza                   | C <sub>12</sub> H <sub>10</sub> N <sub>2</sub> O <sub>2</sub>                        | 214.22 |
| B114                                                         | H                                                                                  | 4-aza                   | C <sub>12</sub> H <sub>10</sub> N <sub>2</sub> O <sub>2</sub>                        | 214.22 |
| B115                                                         | H                                                                                  | 2-aza                   | C <sub>12</sub> H <sub>10</sub> N <sub>2</sub> O <sub>2</sub>                        | 214.22 |
| B115A                                                        | 3-Me                                                                               | 2-Me                    | C <sub>15</sub> H <sub>15</sub> NO <sub>2</sub>                                      | 242.29 |
| B116                                                         | 4-OMe                                                                              | 2-Me                    | C <sub>15</sub> H <sub>15</sub> NO <sub>3</sub>                                      | 257.29 |
| B116A                                                        | H                                                                                  | 2-CH <sub>2</sub> OMe   | C <sub>15</sub> H <sub>15</sub> NO <sub>3</sub>                                      | 257.29 |
| B117                                                         | 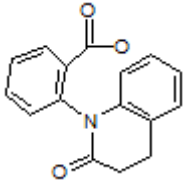  |                         | C <sub>16</sub> H <sub>13</sub> NO <sub>3</sub>                                      | 267.29 |
| B118                                                         |  |                         | C <sub>16</sub> H <sub>13</sub> NO <sub>3</sub>                                      | 267.29 |
| Compounds B119 to B136 are 2-phenoxybenzoic acid derivatives |                                                                                    |                         |  |        |
| B119                                                         | H                                                                                  | 2-CN                    | C <sub>14</sub> H <sub>9</sub> NO <sub>3</sub>                                       | 239.23 |
| B120                                                         | 4-NO <sub>2</sub>                                                                  | 2-Me                    | C <sub>14</sub> H <sub>11</sub> NO <sub>5</sub>                                      | 273.25 |
| B121                                                         | 3-NO <sub>2</sub>                                                                  | 2-Me                    | C <sub>14</sub> H <sub>11</sub> NO <sub>5</sub>                                      | 273.25 |
| B122                                                         | H                                                                                  | 2-Me, 5-NO <sub>2</sub> | C <sub>14</sub> H <sub>11</sub> NO <sub>5</sub>                                      | 273.25 |
| B123                                                         | H                                                                                  | 2-Me, 3-NO <sub>2</sub> | C <sub>14</sub> H <sub>11</sub> NO <sub>5</sub>                                      | 273.25 |
| B124                                                         | H                                                                                  | 2-Me, 5-Cl              | C <sub>14</sub> H <sub>11</sub> ClO <sub>3</sub>                                     | 262.7  |
| B125                                                         | H                                                                                  | 2-Me, 3-Cl              | C <sub>14</sub> H <sub>11</sub> ClO <sub>3</sub>                                     | 262.7  |
| B126                                                         | 3-Cl                                                                               | 2-Me                    | C <sub>14</sub> H <sub>11</sub> ClO <sub>3</sub>                                     | 262.7  |
| B127                                                         | 5-Cl                                                                               | 2-Me                    | C <sub>14</sub> H <sub>11</sub> ClO <sub>3</sub>                                     | 262.7  |
| B128                                                         | 5-NO <sub>2</sub>                                                                  | 2-OMe                   | C <sub>14</sub> H <sub>11</sub> NO <sub>6</sub>                                      | 289.25 |
| B129                                                         | 4-Me                                                                               | H                       | C <sub>14</sub> H <sub>12</sub> O <sub>3</sub>                                       | 228.25 |
| B130                                                         | H                                                                                  | 2-Me                    | C <sub>14</sub> H <sub>12</sub> O <sub>3</sub>                                       | 228.25 |
| B131                                                         | H                                                                                  | 3-Me                    | C <sub>14</sub> H <sub>12</sub> O <sub>3</sub>                                       | 228.25 |
| B132                                                         | H                                                                                  | 4-Me                    | C <sub>14</sub> H <sub>12</sub> O <sub>3</sub>                                       | 228.25 |



|       |       |       |          |        |
|-------|-------|-------|----------|--------|
| B133  | H     | 2-OMe | C14H12O4 | 224.25 |
| B133A | H     | 2-Et  | C15H14O3 | 242.28 |
| B134  | 3-OMe | 2-Me  | C15H14O4 | 258.28 |
| B135  | 4-OMe | 2-Me  | C15H14O5 | 274.28 |
| B136  | 5-OMe | 2-OMe | C15H14O5 | 274.28 |

**Table S3.** List of compounds used for SAR studies.

|                            |                          | Residues lining the internal cavity |         |         |         |         |         |         |         |         |        |         |         |         |        |         |         |         |         |
|----------------------------|--------------------------|-------------------------------------|---------|---------|---------|---------|---------|---------|---------|---------|--------|---------|---------|---------|--------|---------|---------|---------|---------|
|                            | Docking Score (kcal/mol) | Ser 96                              | His 246 | Ser 219 | Phe 194 | Phe 135 | His 218 | Phe 158 | Val 143 | Trp 154 | Phe 27 | Met 147 | Ser 190 | Val 193 | Val 97 | Phe 125 | Phe 144 | Ile 140 | Ala 162 |
| DAD2                       | -10.6                    |                                     |         |         |         |         |         |         |         |         |        |         |         |         |        |         |         |         |         |
| DAD2 <sup>Phe27Val</sup>   | -8.0                     |                                     |         |         |         |         |         |         |         |         | Val    |         |         |         |        |         |         |         |         |
| <i>Z. mays</i>             | -10                      |                                     |         |         |         |         | Val     | Tyr     |         |         |        |         | Cys     |         |        |         |         |         |         |
| <i>S. bicolor</i>          | -10                      |                                     |         |         |         |         | Val     | Tyr     |         |         |        |         | Cys     |         |        |         |         |         |         |
| <i>P. persica</i>          | -9.9                     |                                     |         |         |         |         | Val     |         |         |         |        |         |         |         |        |         |         |         |         |
| <i>A. lyrata</i>           | -9.9                     |                                     |         |         |         |         | Val     |         |         |         |        |         |         |         |        |         |         |         |         |
| <i>V. vinifera</i>         | -9.9                     |                                     |         |         |         |         | Val     |         |         |         |        |         |         | Ile     |        |         |         |         |         |
| <i>R. communis</i>         | -9.9                     |                                     |         |         |         |         | Val     |         |         |         |        |         |         |         |        |         |         |         |         |
| <i>P. trichocarpa_1</i>    | -9.9                     |                                     |         |         |         |         | Val     |         |         |         |        |         |         |         |        |         |         |         |         |
| <i>M. truncatula</i>       | -9.8                     |                                     |         |         |         |         | Met     |         |         |         |        |         |         |         | Ile    |         |         |         |         |
| <i>M. grandiflora</i>      | -9.7                     |                                     |         |         |         |         | Val     |         |         |         |        |         |         |         |        |         |         |         |         |
| <i>A. trichopoda</i>       | -9.7                     |                                     |         |         |         |         | Val     |         |         |         |        |         | Cys     | Ile     |        |         |         |         |         |
| <i>B. distachyon</i>       | -9.7                     |                                     |         |         |         |         | Val     | Tyr     |         |         |        |         | Cys     |         |        |         |         |         |         |
| <i>O. sativa (OsD14)</i>   | -9.7                     |                                     |         |         |         |         | Val     | Tyr     |         |         |        |         | Cys     |         |        |         |         |         |         |
| <i>C. sativus</i>          | -9.5                     |                                     |         |         |         |         | Val     |         |         |         |        |         |         | Ile     |        |         |         |         |         |
| <i>A. thaliana (AtD14)</i> | -9.5                     |                                     |         |         |         |         | Val     |         |         |         |        |         |         |         |        |         |         |         |         |
| <i>A. coerulea</i>         | -9.2*                    |                                     |         |         |         |         | Cys     |         | Leu     |         |        |         | Cys     |         |        |         |         |         |         |
| <i>S. italica</i>          | -9.1*                    |                                     |         |         |         |         | Val     | Tyr     |         |         |        |         | Cys     |         |        |         |         |         |         |
| <i>M. esculenta</i>        | -8.6                     |                                     |         |         |         |         | Val     |         |         |         | Val    |         |         |         |        |         |         |         |         |
| <i>M. guttatus</i>         | -8.4*                    |                                     |         |         |         |         | Val     |         | Phe     |         |        |         |         |         |        |         |         |         |         |
| <i>P. trichocarpa_2</i>    | -8.3                     |                                     |         |         |         |         | Val     |         |         |         | Val    |         |         |         |        |         |         |         |         |

\*Best docking solutions have pose different from tolfenamic acid in DAD2 structure. Scores shown are from the second docking solutions, whose poses are similar to tolfenamic acid in DAD2 structure.

**Table S4.** Autodock Vina docking score for tolfenamic acid in models of D14 orthologues. The models are ranked by decreasing order of the tolfenamic acid docking score (binding affinity) value. Protein accession numbers for D14 orthologues are JQ654486 (*petunia hybrida*), XM\_008662207 (*Zea mays*), XM\_002468271 (*Sorghum bicolor*), XM\_007222936 (*Prunus persica*), XM\_002882278 (*Arabidopsis lyrata*), XM\_002281331 (*Vitis vinifera*), XM\_002510055 (*Ricinus communis*), XM\_002320654 (*Populus trichocarpa\_1*), XM\_003589038 (*Medicago truncatula*), WBOD-2007195 (*Magnolia grandiflora*), XM\_006849255 (*Amborella trichopoda*), XM\_003558507 (*Brachypodium distachyon*), XM\_015775914 (*Oryza sativa ssp. Japonica*), XM\_004142842 (*Cucumis sativus*), AY064145 (*Arabidopsis thaliana*), Aqcoe6G293700 (*Aquilegia coerulea*), XM\_004985235 (*Setaria italica*), Manes18G046100 (*Manihot esculenta*), XM\_012989321 (*Mimulus guttatus*), XM\_002302373 (*Populus trichocarpa\_2*).

## Supplementary Figures

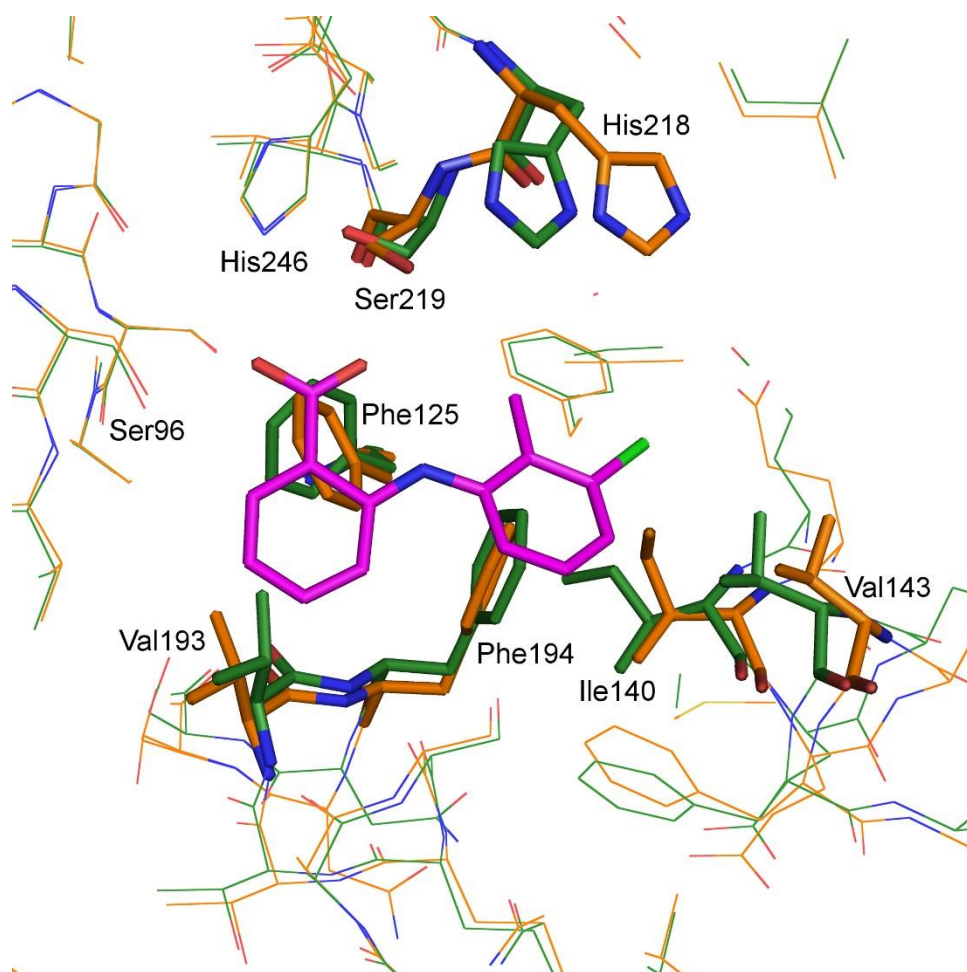

**Figure S1.** Structural comparisons. Structural superimposition between the apo (green) and tolfenamic acid-bound (orange) structures. Residues undergoing conformational changes around tolfenamic acid are drawn in stick mode and labelled.

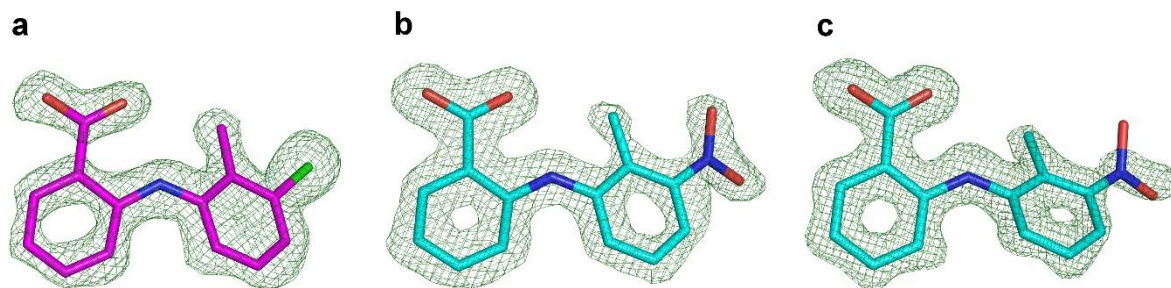

**Figure S2.** Omit maps for the DAD2/tolfenamic acid (a), DAD2/MNAB (b) and OsD14/MNAB (c) structures. To generate the omit maps, bound compounds were removed from the final PDB models. After 10 cycle of restrained refinement in reftmac, the sigmaA-weighted difference maps (omit maps) were calculated. Omit maps contoured at 3  $\sigma$  are shown in green, together with the bound compounds of the final PDB models.

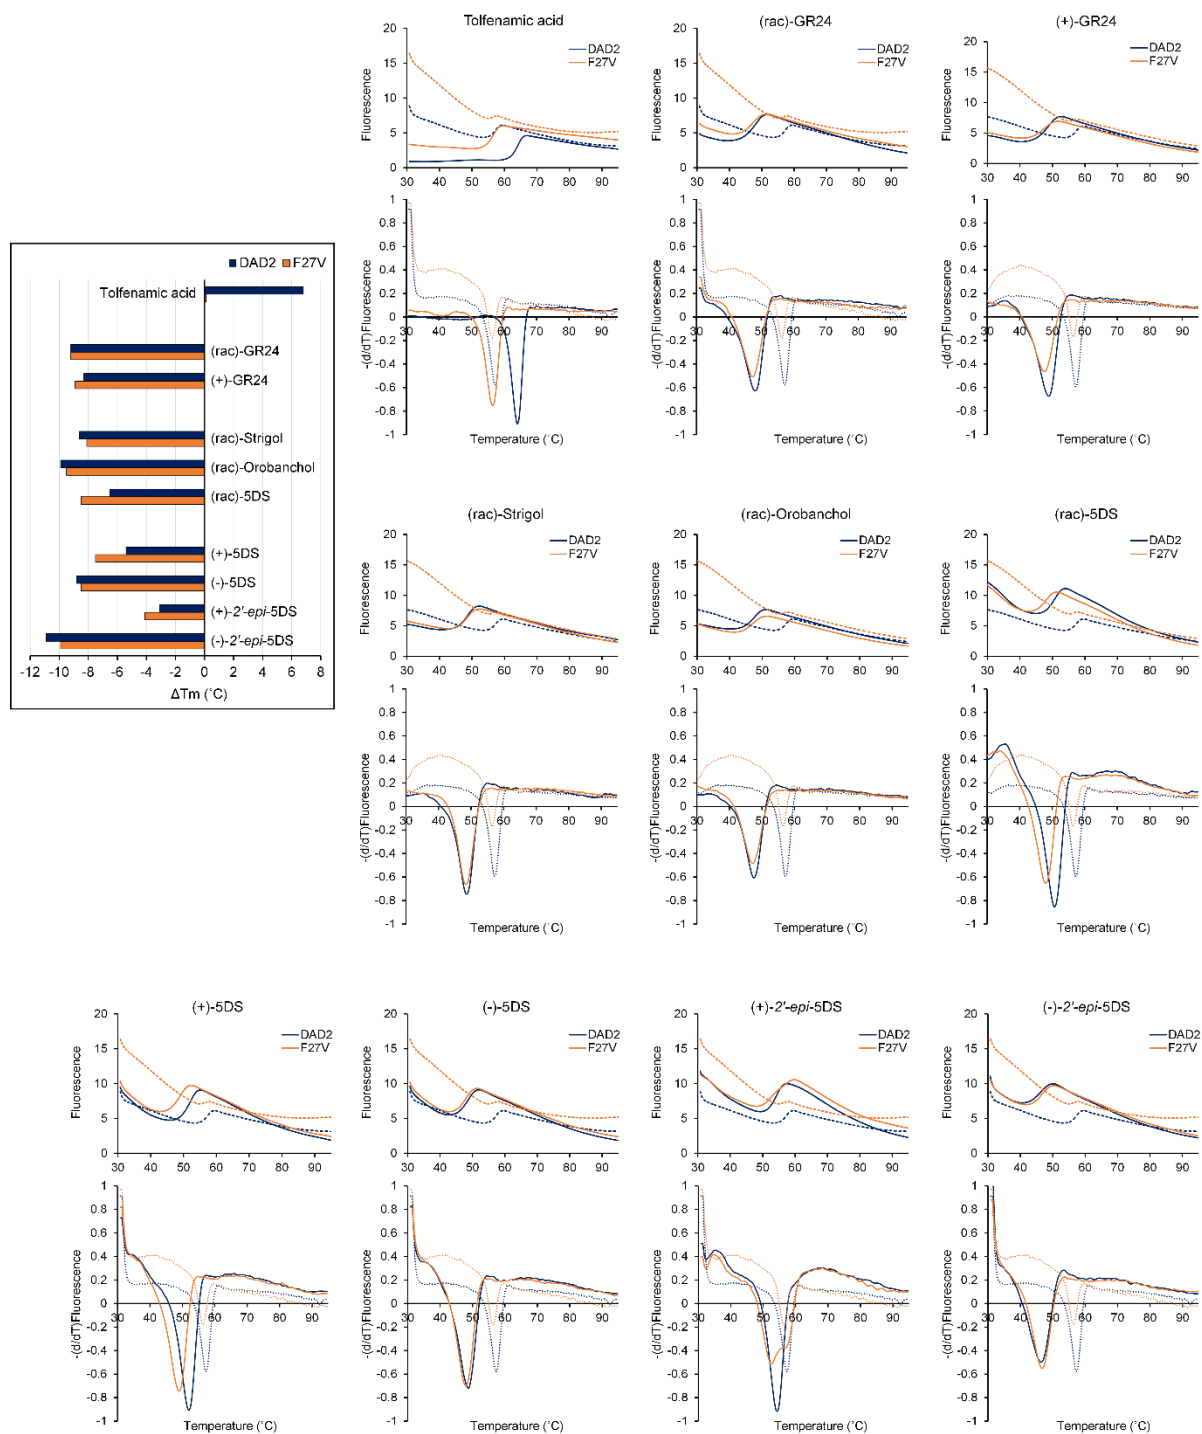

**Figure S3.** DSF assay of DAD2 and DAD2<sub>Phe27Val</sub> (F27V). The insert shows a summary of melting shifts observed for DAD2 and DAD2<sub>Phe27Val</sub> (F27V) in presence of tolfenamic acid and strigolactone compounds. Experimental melting curves and derivatives of melting curves are shown for each individual compound (dotted lines are DMSO controls while solid lines are in presence of compounds). All experiments were performed in triplicates.

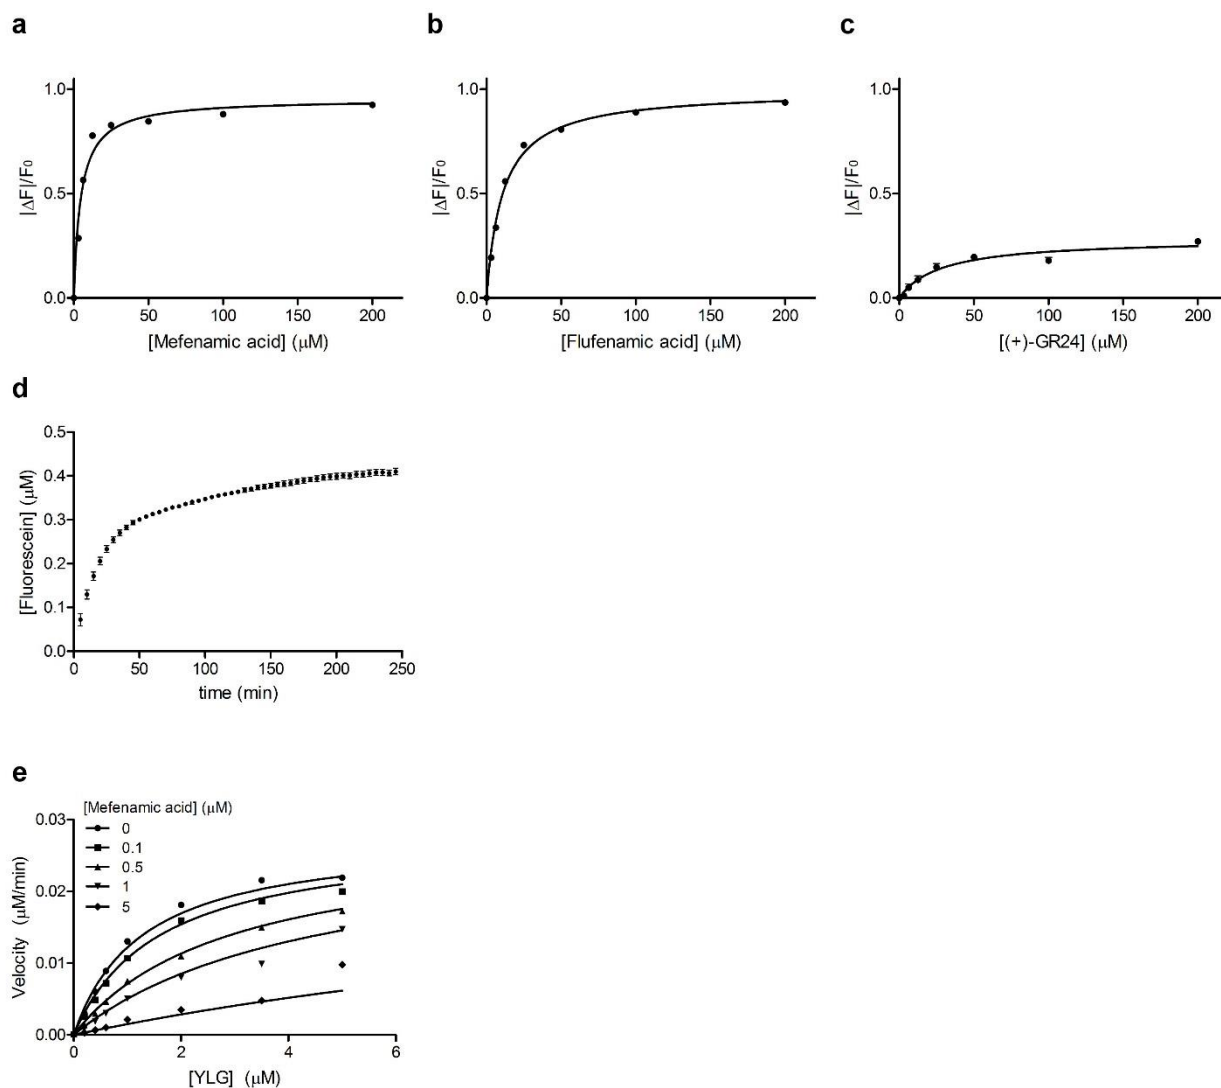

**Figure S4.** DAD2 binding and kinetics. (a) (b) (c) Binding curves of mefenamic acid, flufenamic acid and (+)-GR24, respectively, to DAD2 using intrinsic fluorescence experiments. Each data point is the mean  $\pm$  s.e.m. of three technical replicates. (d) Progress curve of YLG hydrolysis (1  $\mu\text{M}$ ) by DAD2 (0.34  $\mu\text{M}$ ) over 4 hours. Each data point is the mean  $\pm$  s.e.m. of three technical replicates. (e) YLG hydrolysis competition assays using mefenamic acid. Each data point is the average of 3 technical replicates. All the individual replicates for each compound concentration were included during the non-linear global fit analysis using mixed-inhibition model.

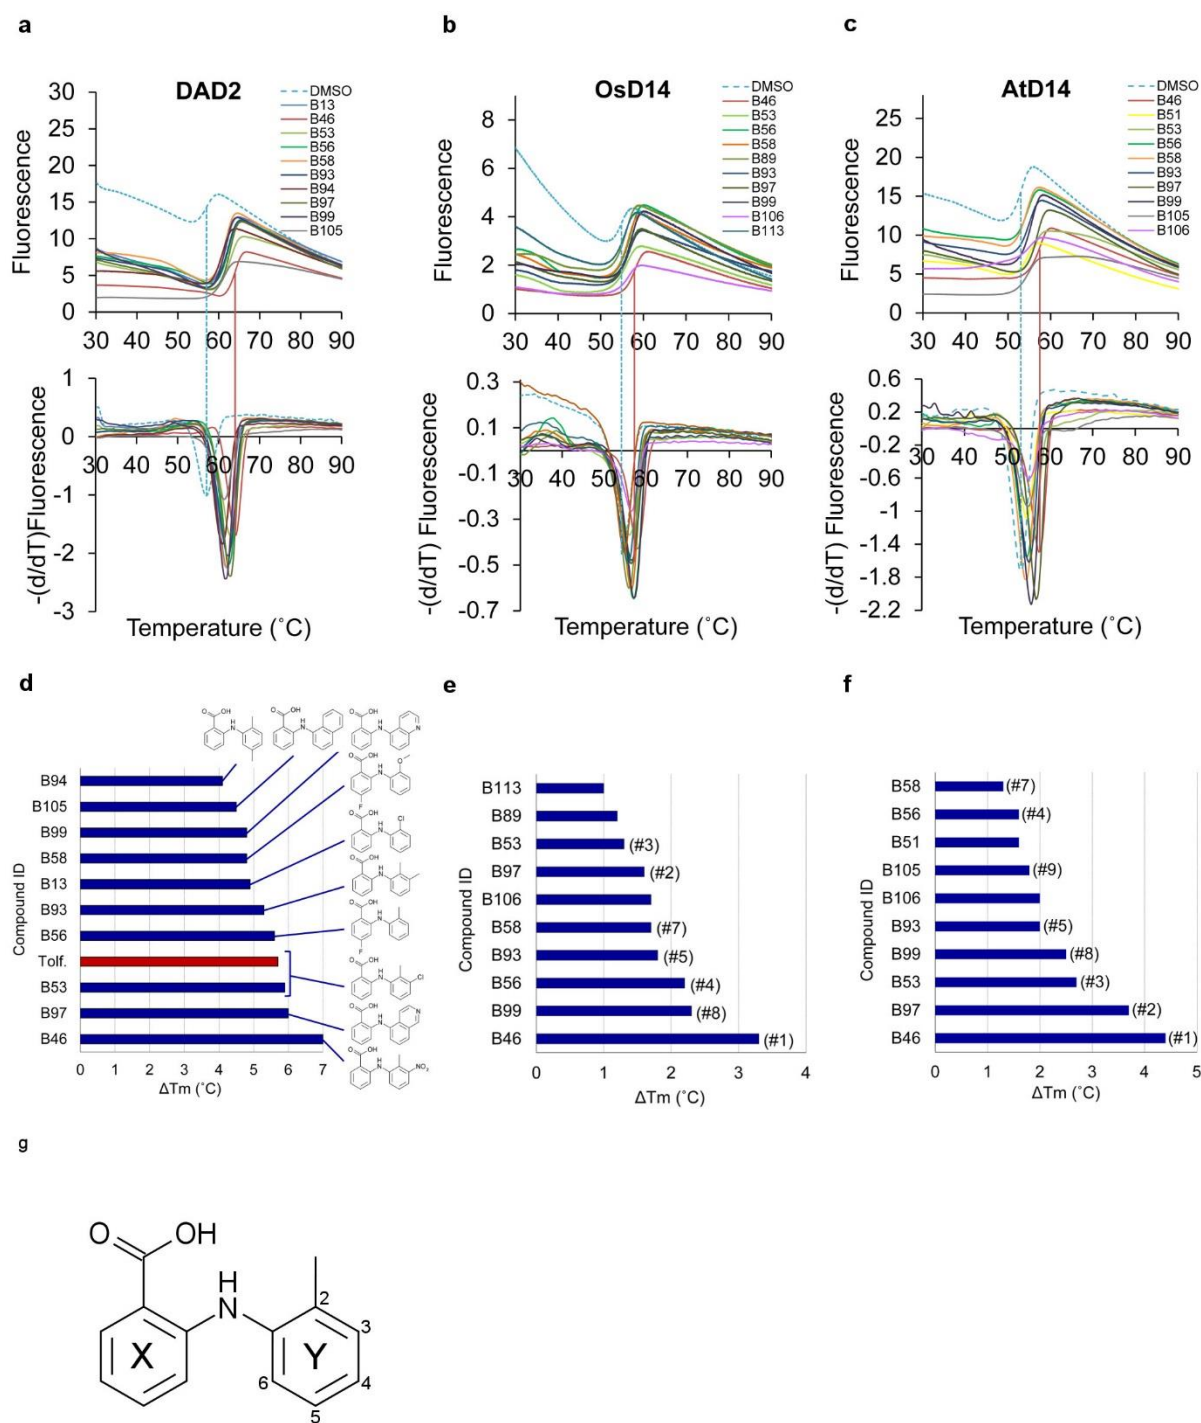

**Figure S5.** SAR study. Experimental melting curves and derivatives of the melting curves for DAD2 (a), OsD14 (b) and AtD14 (d) in presence of the top ten compounds. The dotted and plain vertical lines corresponds to the melting temperatures of DAD2, OsD14 and AtD14 in presence of DMSO and of the best compound, B46 (MNAB), respectively. (d), (e) and (f) Histograms of the ten largest melting temperature shifts observed for DAD2, OsD14 and AtD14, respectively. In (e) and (f) compounds that also trigger a shift in DAD2's melting temperature are indicated by a number at the right side of each bar, the number referring to the position of this compound within DAD2's top ten list (d). (g) N-(2-Methylphenyl)anthranilic acid represents the core pharmacophore, as determined from the SAR experiments.



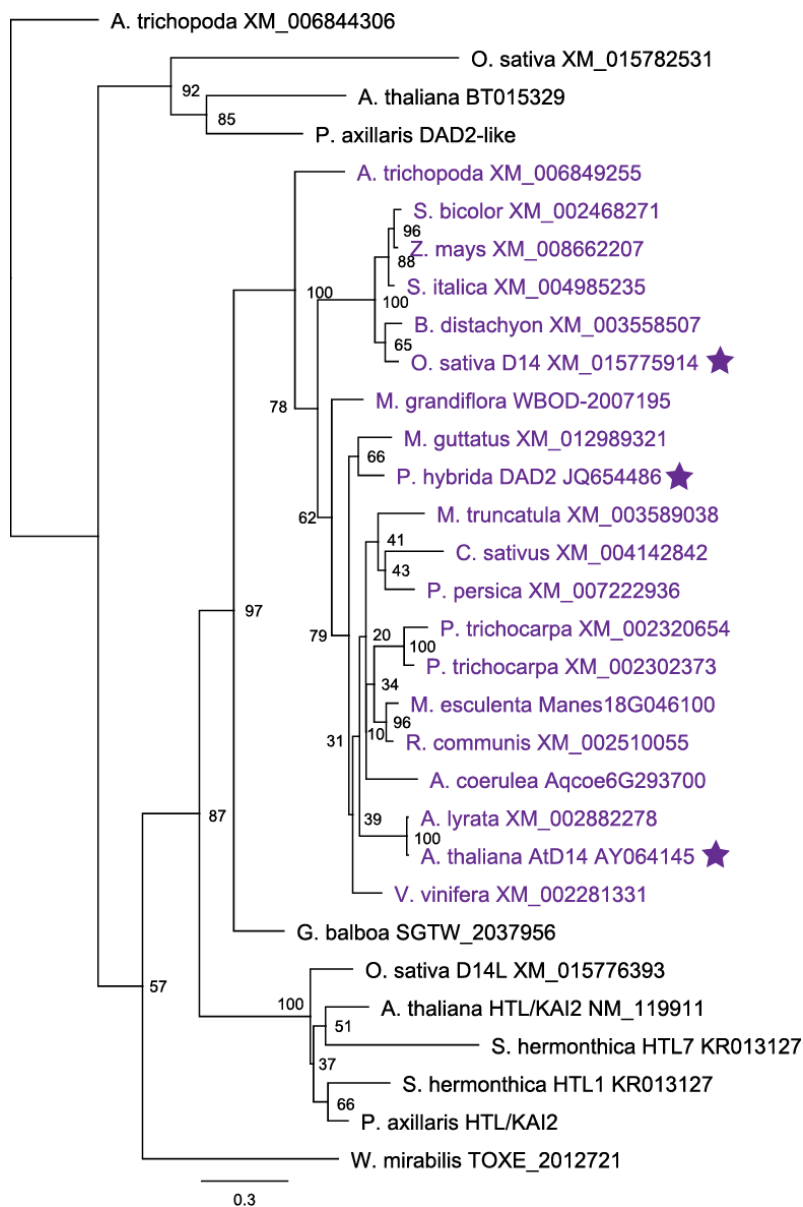

**Figure S6.** DAD2 phylogenetic analysis. A phylogenetic tree of a selection of the  $\alpha/\beta$  fold hydrolases related to DAD2. Proteins with similarity to DAD2 were identified using BLAST searches against the *Petunia axillaris* genome (<https://solgenomics.net/>); the 1000 plants project (<https://sites.google.com/a/ualberta.ca/onekp/>) *G. balboa*, *W. mirabilis*, and *M. grandiflora*; Phytozome (<https://phytozome.jgi.doe.gov>) *A. coerulea* and *M. esculenta*; and the remaining sequences from the NCBI databases. The protein sequences were aligned using Geneious Align as implemented in Geneious R8 and manually corrected. The alignment is available in Supplemental data file 3 in nexus format. A maximum likelihood tree was drawn using RAxML and the topology support was calculated with 1000 bootstrap replicates and manually rooted on the *A. trichopoda* XM\_006844306 node. The proteins included in the modelling and docking analysis are shown in purple. The three proteins marked with stars were expressed and proteins analysed biochemically.

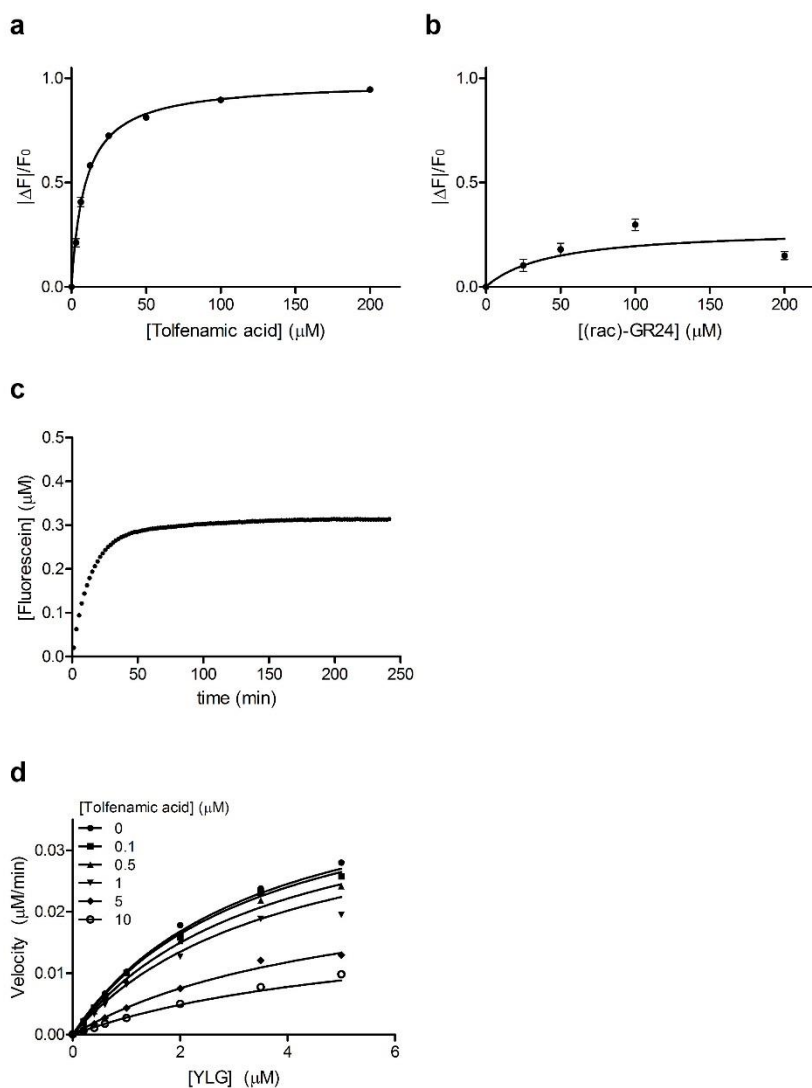

**Figure S7.** OsD14 binding and kinetics. **(a)** **(b)** Binding curves of tolfenamic acid and (rac)-GR24, respectively, to OsD14 using intrinsic fluorescence experiments. Each data point is the mean  $\pm$  s.e.m. of three technical replicates. **(d)** Progress curve of YLG hydrolysis (1  $\mu\text{M}$ ) by OsD14 (0.34  $\mu\text{M}$ ) over 4 hours. Each data point is the mean  $\pm$  s.e.m. of three technical replicates. **(e)** YLG hydrolysis competition assays using tolfenamic acid. Each data point is the average of 3 technical replicates. All the individual replicates for each compound concentration were included during the non-linear global fit analysis using mixed-inhibition model.

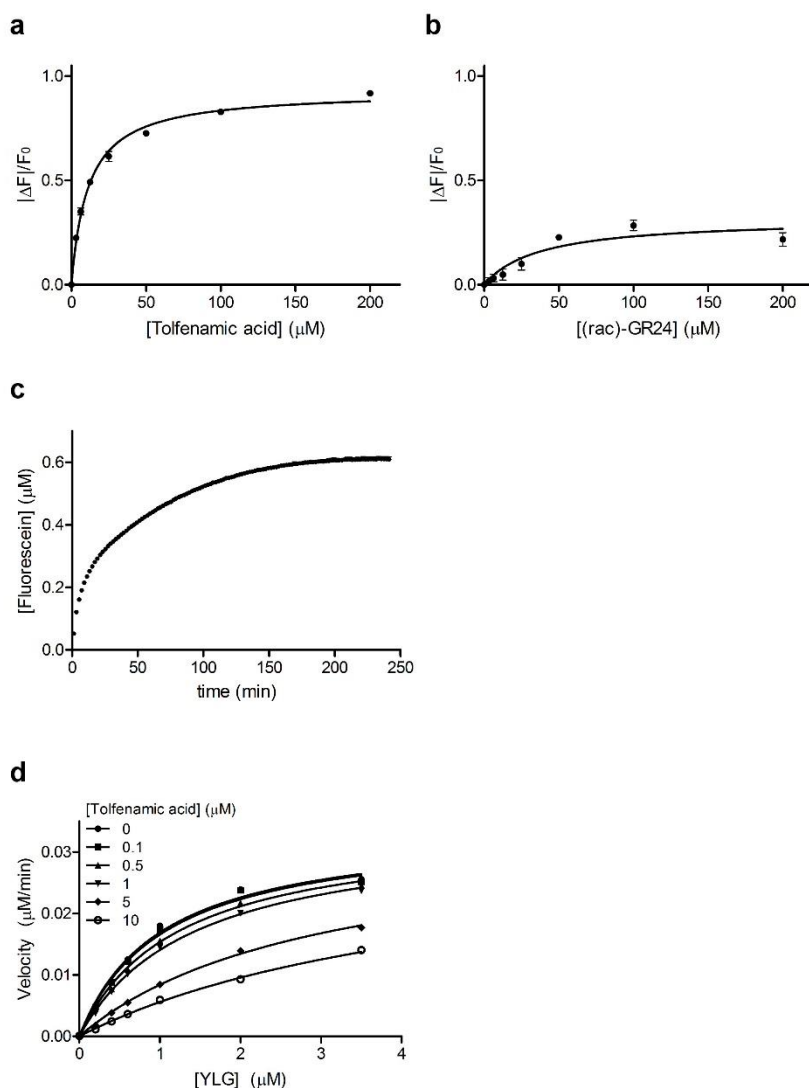

**Figure S8.** AtD14 binding and kinetics. **(a)** **(b)** Binding curves of tolfenamic acid and (rac)-GR24, respectively, to AtD14 using intrinsic fluorescence experiments. Each data point is the mean  $\pm$  s.e.m. of three technical replicates. **(d)** Progress curve of YLG hydrolysis (1  $\mu\text{M}$ ) by AtD14 (0.34  $\mu\text{M}$ ) over 4 hours. Each data point is the mean  $\pm$  s.e.m. of three technical replicates. **(e)** YLG hydrolysis competition assays using tolfenamic acid. Each data point is the average of 3 technical replicates. All the individual replicates for each compound concentration were included during the non-linear global fit analysis using mixed-inhibition model.

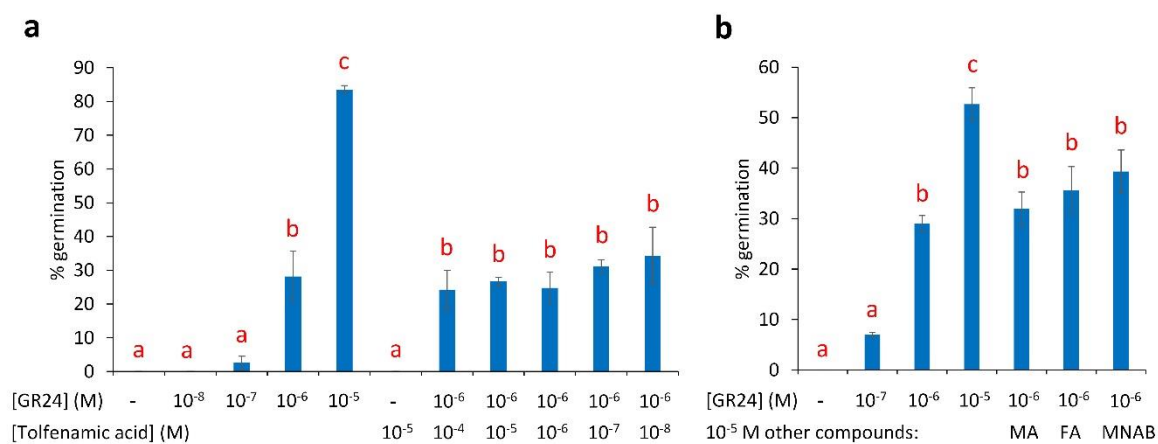

**Figure S9.** Effects of compounds on germination of *Orobanche minor* seed. **(a)** Treatments had different concentrations of GR24 and tolfenamic acid; n=3 replicates each containing 48-116 seed, data shown are means  $\pm$  s.e.m. **(b)** treatments had GR24 and either mefenamic acid (MA), flufenamic acid (FA) or 2-(2'-methyl-3'-nitroanilino)benzoic acid (MNAB); n=3 replicates each containing 34-120 seed, data shown are means  $\pm$  s.e.m. Statistical tests of differences between treatments were calculated by ANOVA, values with the same lower case identifier (in red, within each experiment) are not significantly different from each other ( $P=0.01$ ).

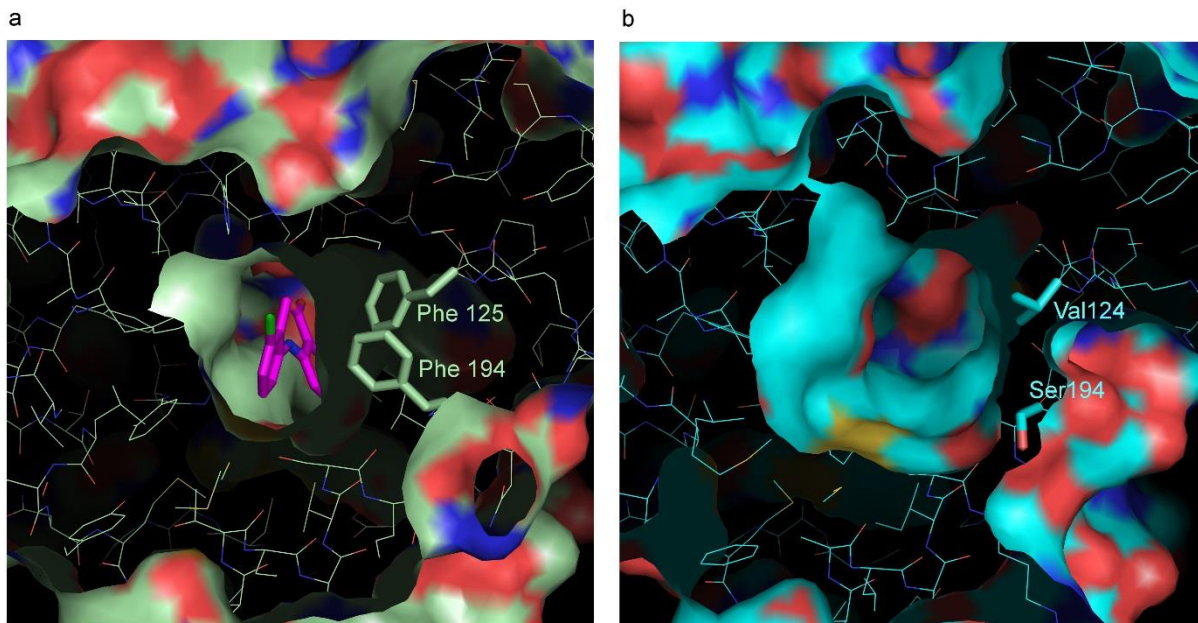

**Figure S10.** Comparisons of the internal cavities of DAD2 and ShHTL5. **(a)** Surface representation of DAD2 showing its internal cavity, with bound tolfenamic acid drawn in pink. Phe125 and Phe194 lining the right side of the cavity are highlighted in stick mode. **(b)** Surface representation of ShHTL5 (PDB 5CBK) showing its internal cavity drawn in the same orientation as DAD2. The absence of Phe125 and Phe194, replaced by Val124 and Ser194, respectively, creates a much larger cavity at the right hand side of the position where tolfenamic acid is bound in the DAD2 structure.

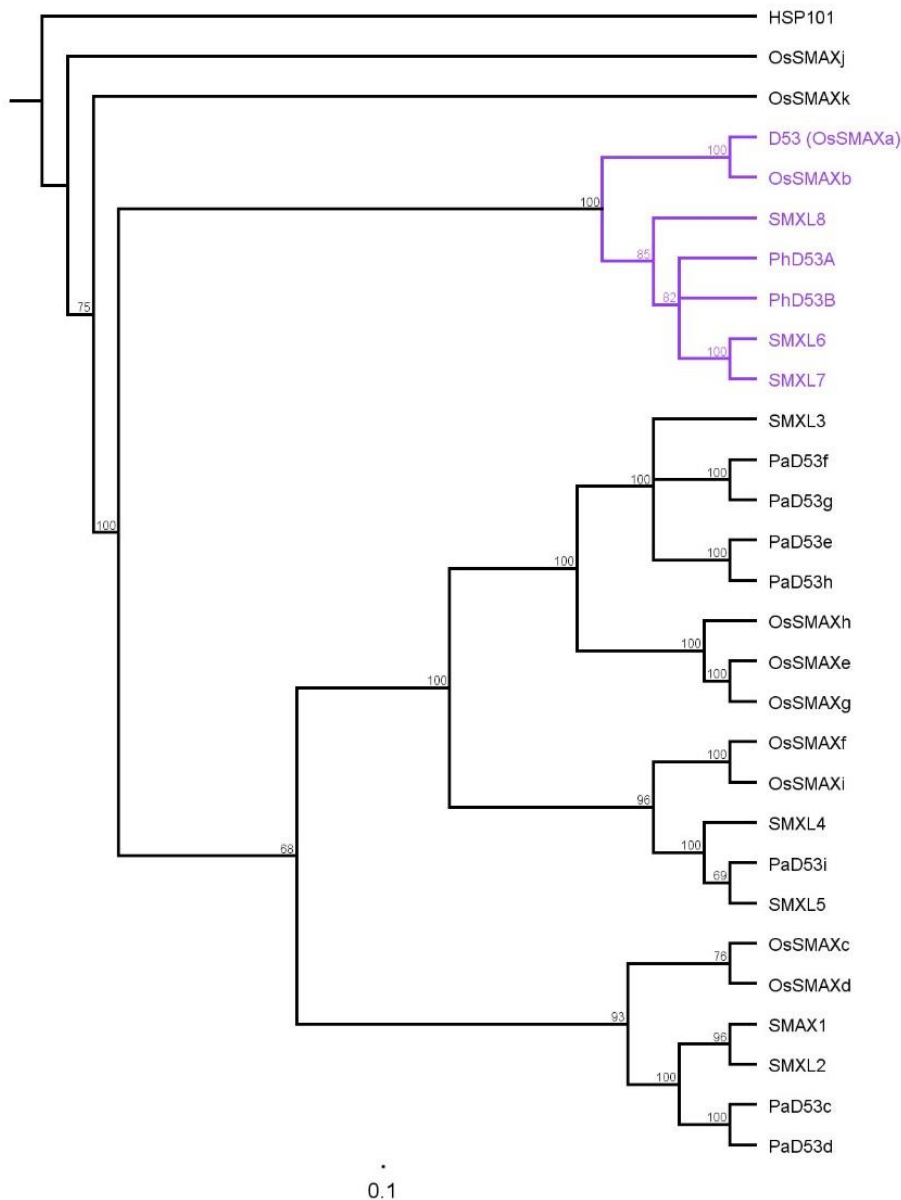

**Figure S11.** D53 Phylogenetic analysis. A phylogenetic tree of the petunia, rice and Arabidopsis D53 proteins. Proteins with sequence similarity to the D53 protein from rice were identified using iterative BLAST searches against the petunia genome (<https://solgenomics.net/>), the rice genome (<http://rice.plantbiology.msu.edu/>) and the Arabidopsis genome (<https://www.arabidopsis.org/>). The proteins identified are available in Supplemental data file 1 with the names we have assigned and the original accession numbers from the relevant databases. An alignment was calculated using Geneious Align as implemented in Geneious R8 and manually corrected and is available in Supplemental data file 2 in nexus format. A maximum likelihood tree was drawn using RAxML and the topology support was calculated with 1000 bootstrap replicates and manually rooted on the HSP101 node. The clade containing the original rice D53 has been highlighted in magenta.

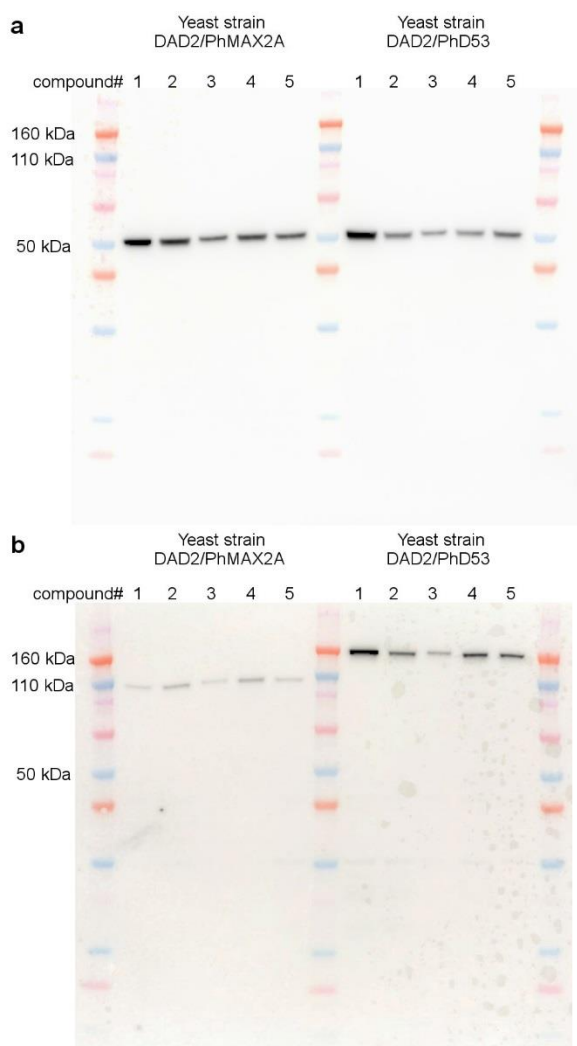

**Figure S12.** Western blot controls for expression of proteins in yeast. (a) Detection of the binding domain of GAL4 (fused to DAD2) using the Santa Cruz GAL-TA (C10) primary antibody. (b) Detection of the activation domain of GAL4 (fused to PhMAX2A or PhD53) using the Santa Cruz GAL4 (RK5C1) primary antibody. In both cases, the secondary antibody was Goat Anti-Mouse IgG (H + L)-HRP conjugate (Biorad #1706516). Yeast cells were grown in the presence of the following compounds, as indicated: 1-DMSO ; 2-(rac)GR24 5  $\mu$ M ; 3-Tolfenamic acid 50  $\mu$ M ; 4-Mefenamic acid 50  $\mu$ M and 5-Flufenamic acid 50  $\mu$ M.
